# Supplementary material for: Antioxidant Phenylpropanoid Glycosides from Ginkgo biloba Fruit and Identification of a New Phenylpropanoid Glycoside, Ginkgopanoside
Source: MDPI journal article supplement (doi:10.3390/plants10122702), 2021-12-08
Supplement: s1 [file s1]

## Supplementary data

---

# **Antioxidant Phenylpropanoid Glycosides from *Ginkgo biloba* Fruit and Identification of a New Phenylpropanoid Glycoside, Ginkgopanoside**

Akida Alishir, and Ki Hyun Kim\*

*School of Pharmacy, Sungkyunkwan University, Suwon 16419, Korea; akida.alishir@gmail.com (A.A.)*

\* Corresponding author: khkim83@skku.edu; Tel.: +82-31-290-7700

## Supporting Information Contents:

|                                                                                                                                                                   |     |
|-------------------------------------------------------------------------------------------------------------------------------------------------------------------|-----|
| <b>Figure S1.</b> The HRESIMS data of <b>1</b> .....                                                                                                              | S3  |
| <b>Figure S2.</b> The <sup>1</sup> H NMR spectrum of <b>1</b> (D <sub>2</sub> O, 850 MHz).....                                                                    | S4  |
| <b>Figure S3.</b> The HSQC spectrum of <b>1</b> (D <sub>2</sub> O).....                                                                                           | S5  |
| <b>Figure S4.</b> The HMBC spectrum of <b>1</b> (D <sub>2</sub> O).....                                                                                           | S6  |
| <b>Figure S5.</b> The <sup>1</sup> H- <sup>1</sup> H COSY spectrum of <b>1</b> (D <sub>2</sub> O).....                                                            | S7  |
| <b>Figure S6.</b> Retention time of reaction products of thiocarbamoyl-thiazolidine derivatives of D-glucopyranose standard and glucopyranose from <b>1</b> ..... | S8  |
| <b>Figure S7.</b> The circular dichroism spectrum of <b>1</b> .....                                                                                               | S9  |
| <b>Figure S8.</b> The ESIMS data of <b>2</b> .....                                                                                                                | S10 |
| <b>Figure S9.</b> The <sup>1</sup> H NMR spectrum of <b>2</b> (CD <sub>3</sub> OD, 850 MHz).....                                                                  | S11 |
| <b>Figure S10.</b> The ESIMS data of <b>3</b> .....                                                                                                               | S12 |
| <b>Figure S11.</b> The <sup>1</sup> H NMR spectrum of <b>3</b> (CD <sub>3</sub> OD, 850 MHz).....                                                                 | S13 |
| <b>Figure S12.</b> The ESIMS data of <b>4</b> .....                                                                                                               | S14 |
| <b>Figure S13.</b> The <sup>1</sup> H NMR spectrum of <b>4</b> (CD <sub>3</sub> OD, 850 MHz).....                                                                 | S15 |
| <b>Figure S14.</b> The ESIMS data of <b>5</b> .....                                                                                                               | S16 |
| <b>Figure S15.</b> The <sup>1</sup> H NMR spectrum of <b>5</b> (CD <sub>3</sub> OD, 850 MHz).....                                                                 | S17 |
| <b>Figure S16.</b> The ESIMS data of <b>6</b> .....                                                                                                               | S18 |
| <b>Figure S17.</b> The <sup>1</sup> H NMR spectrum of <b>6</b> (CD <sub>3</sub> OD, 850 MHz).....                                                                 | S19 |
| <b>General experimental procedure</b> .....                                                                                                                       | S20 |

**Figure S1.** The HRESIMS data of **1**

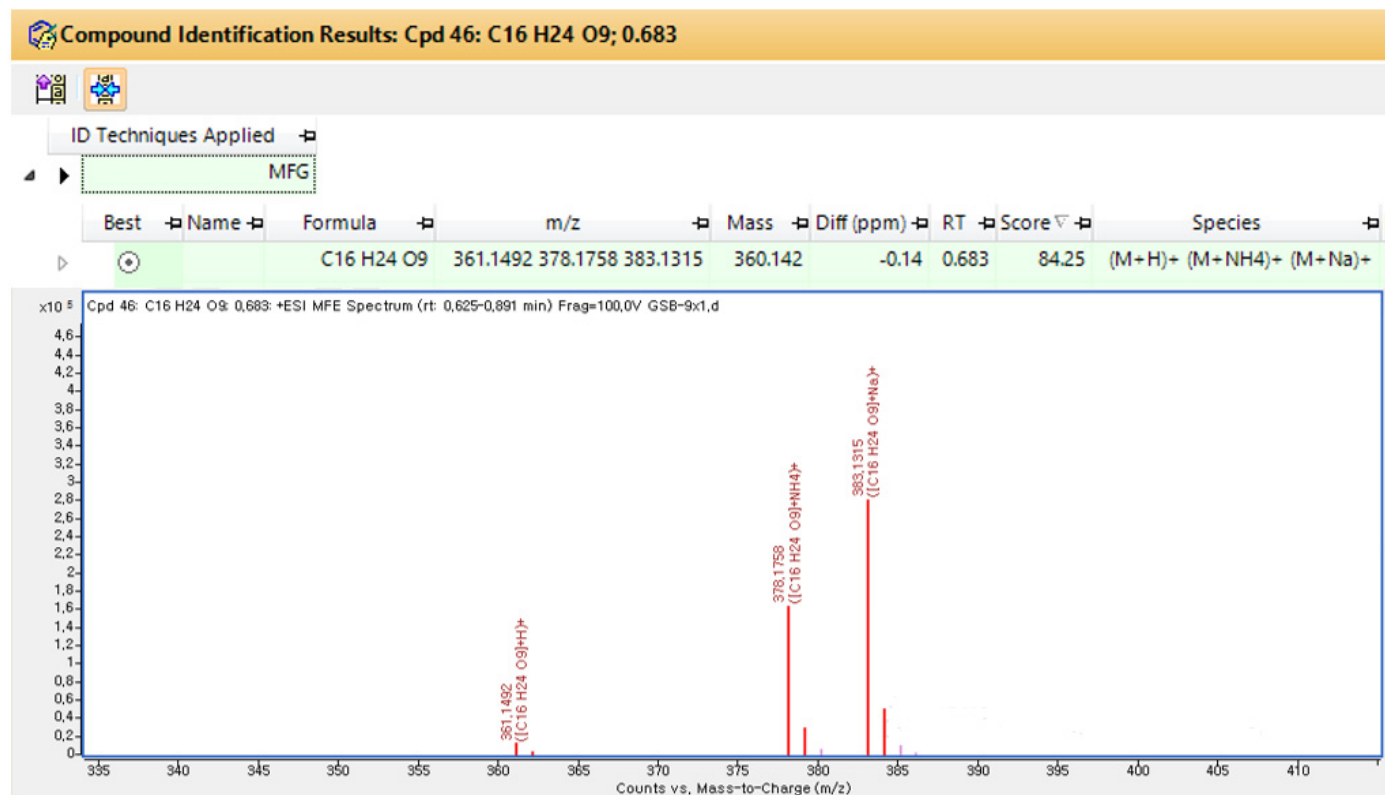

**Figure S2.** The  $^1\text{H}$  NMR spectrum of **1** ( $\text{D}_2\text{O}$ , 850 MHz)

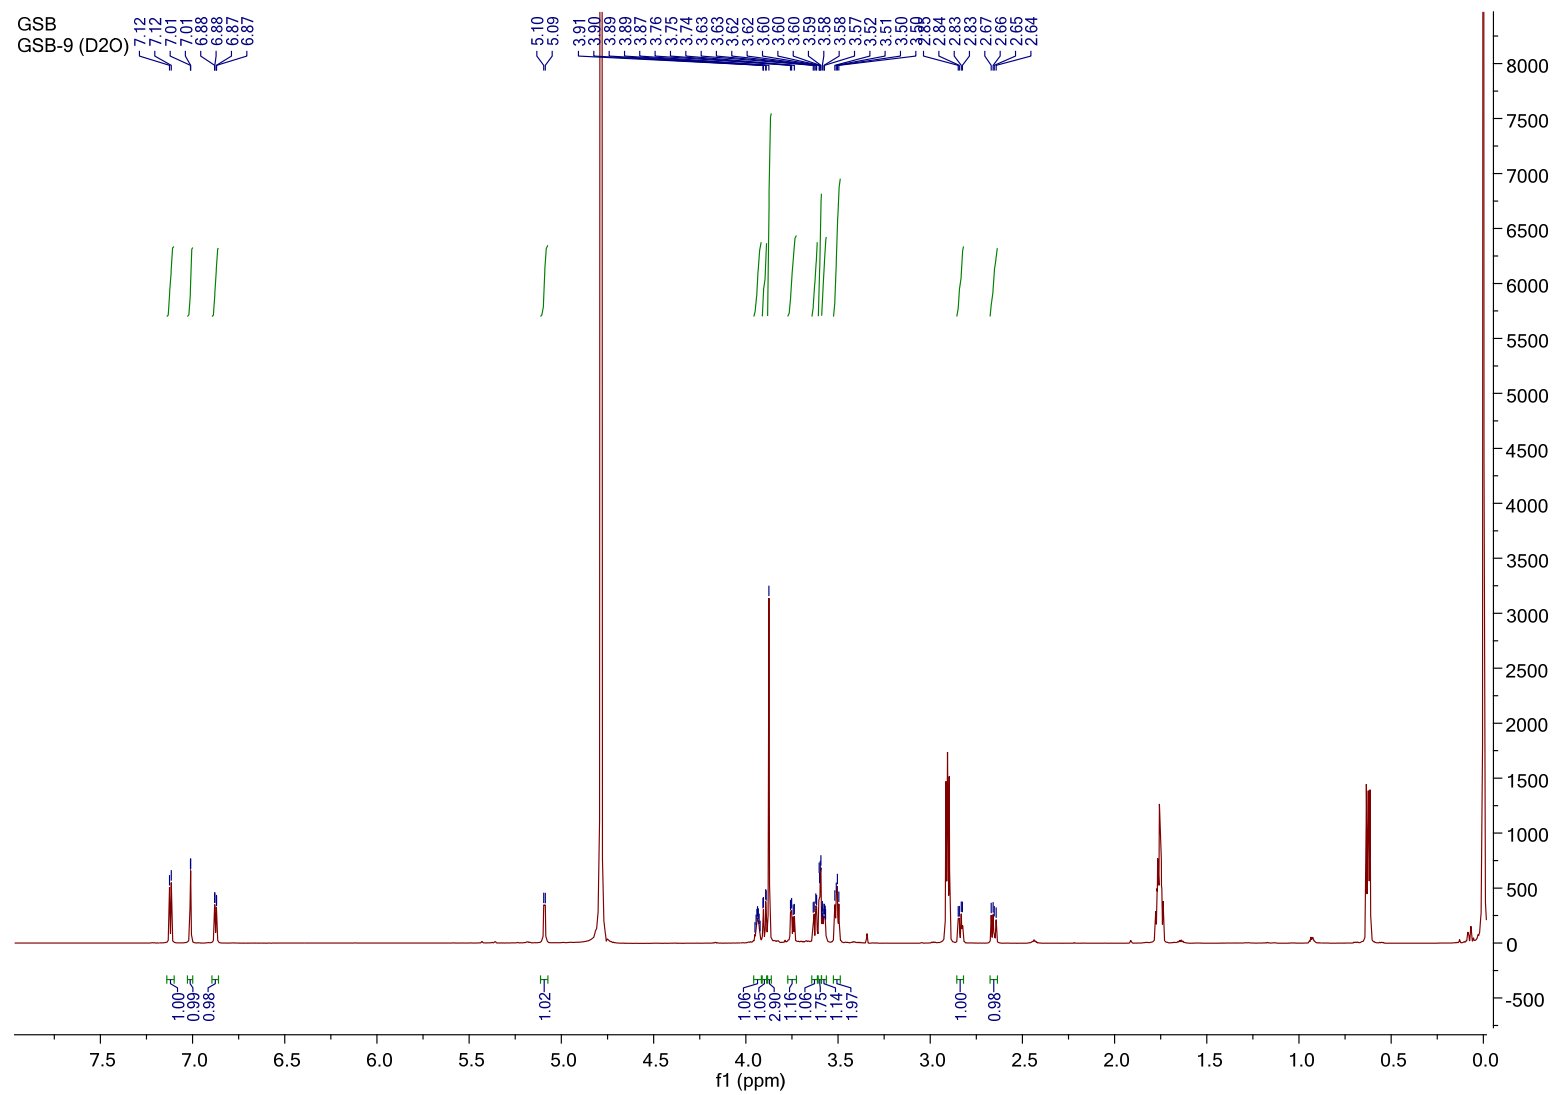

**Figure S3.** The HSQC spectrum of **1** (D<sub>2</sub>O)

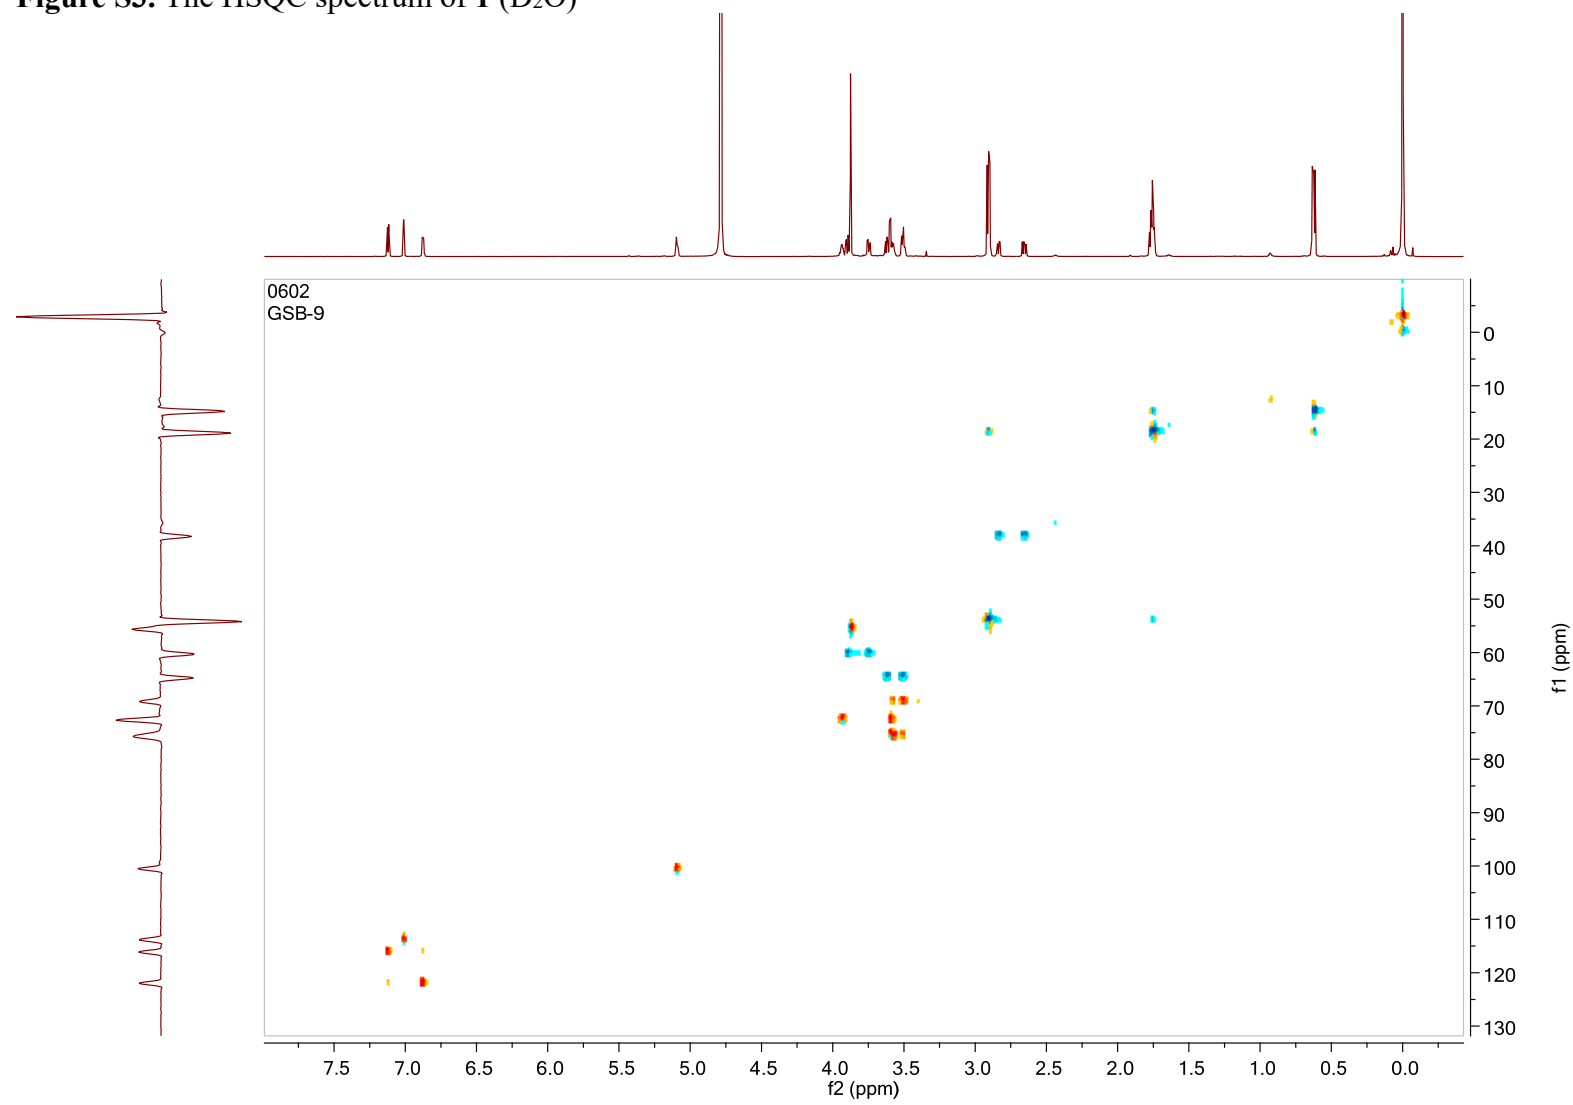

**Figure S4.** The HMBC spectrum of **1** (D<sub>2</sub>O)

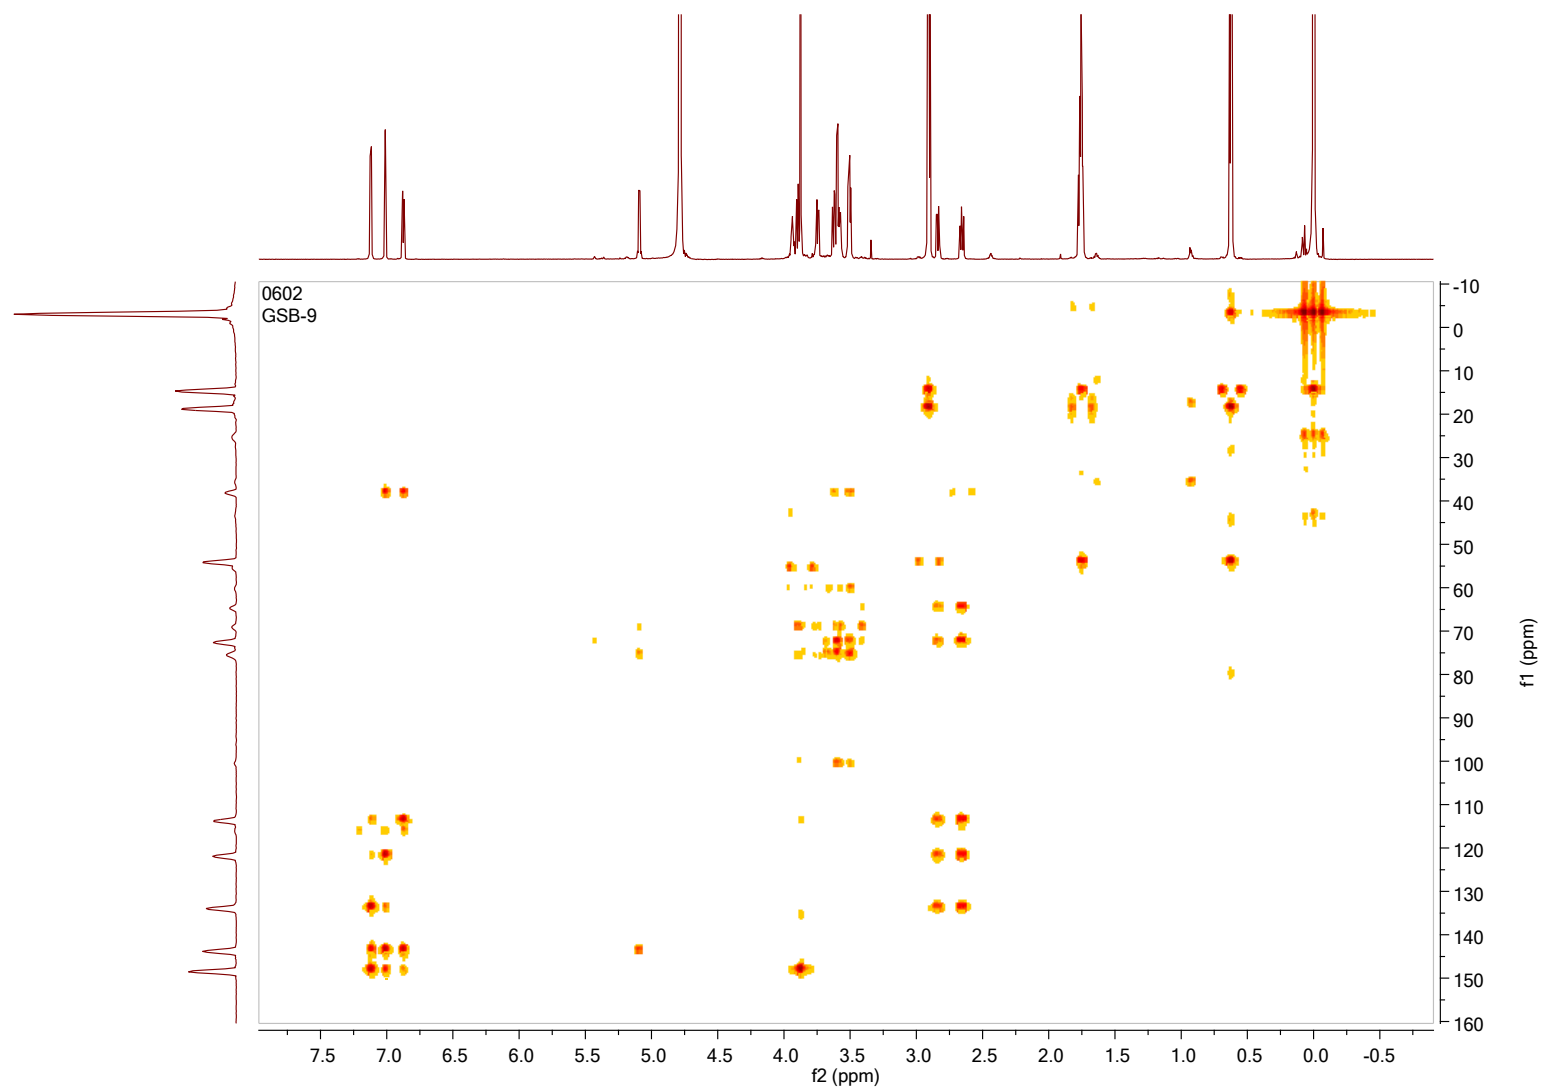

**Figure S5.** The  $^1\text{H}$ - $^1\text{H}$  COSY spectrum of **1** ( $\text{D}_2\text{O}$ )

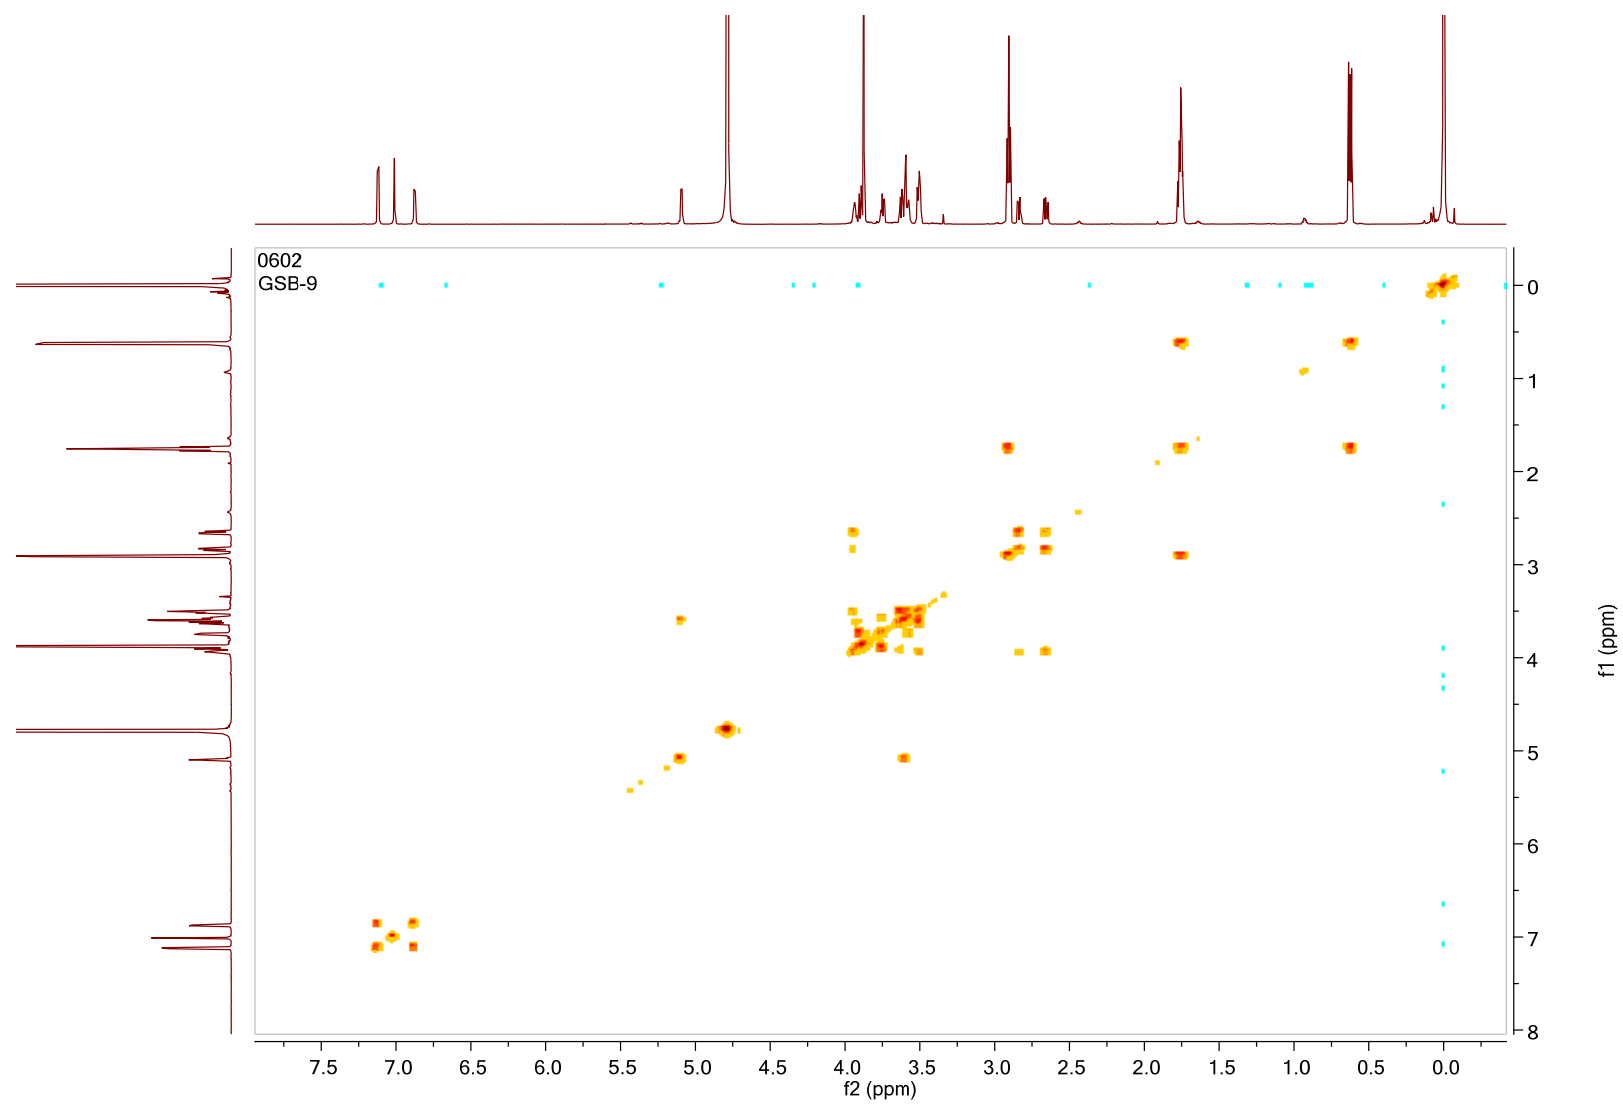

**Figure S6.** Retention time of reaction products of thiocarbamoyl-thiazolidine derivatives of D-glucopyranose standard and glucopyranose from compound **1**

**Positive**

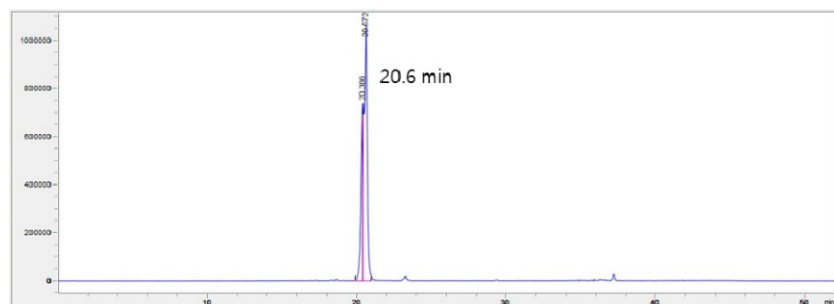

Reaction product of D-glucopyranose standard

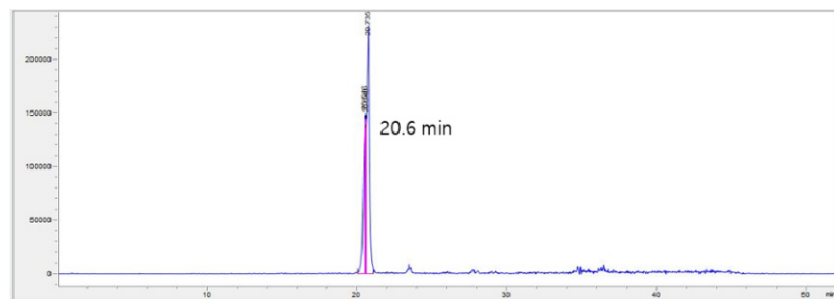

Reaction product of glucopyranose from compound **1**

**Negative**

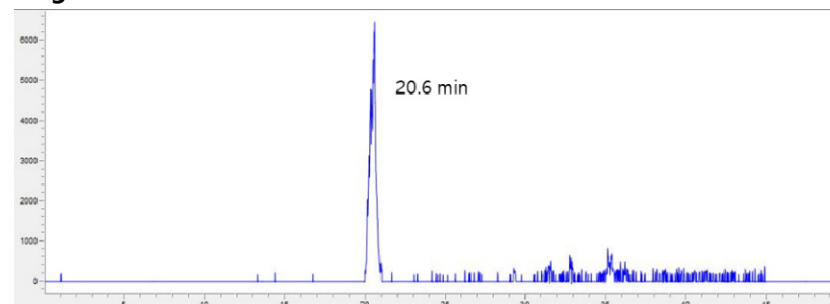

Reaction product of D-glucopyranose standard

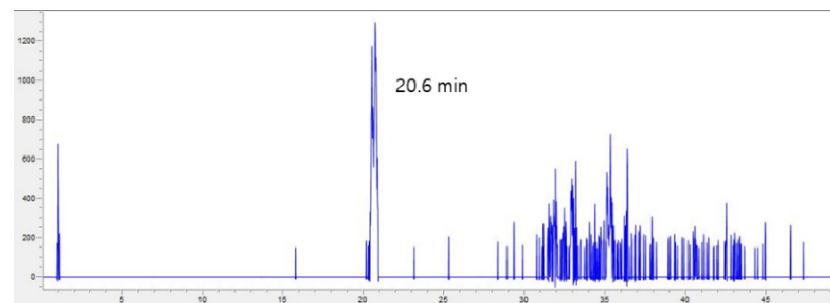

Reaction product of glucopyranose from compound **1**

**Figure S7.** The circular dichroism spectrum of compound **1**

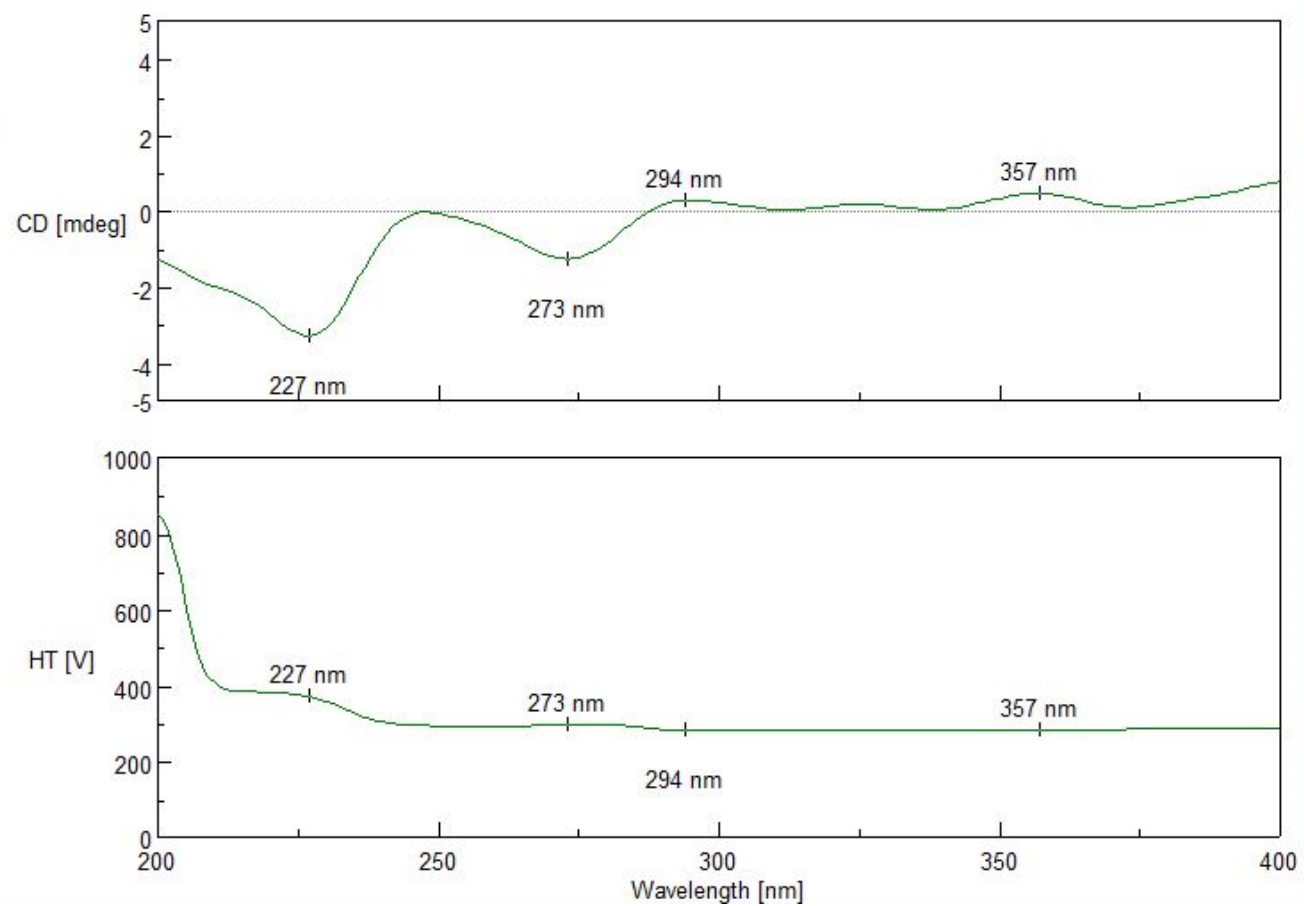

**Figure S8.** The ESIMS data of **2** (negative-ion mode)

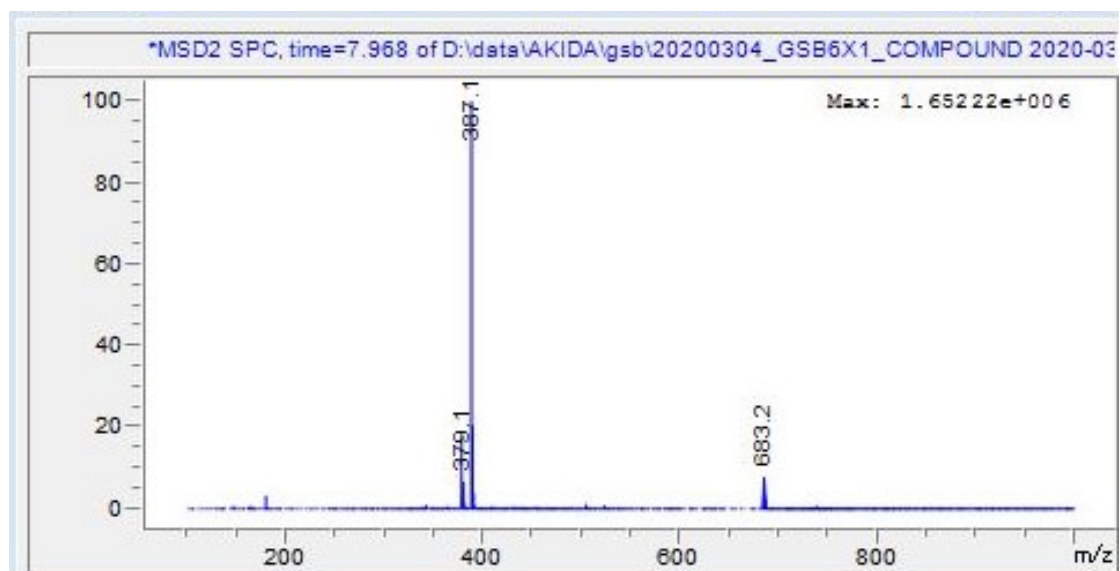

**Figure S9.** The  $^1\text{H}$  NMR spectrum of **2** ( $\text{CD}_3\text{OD}$ , 850 MHz)

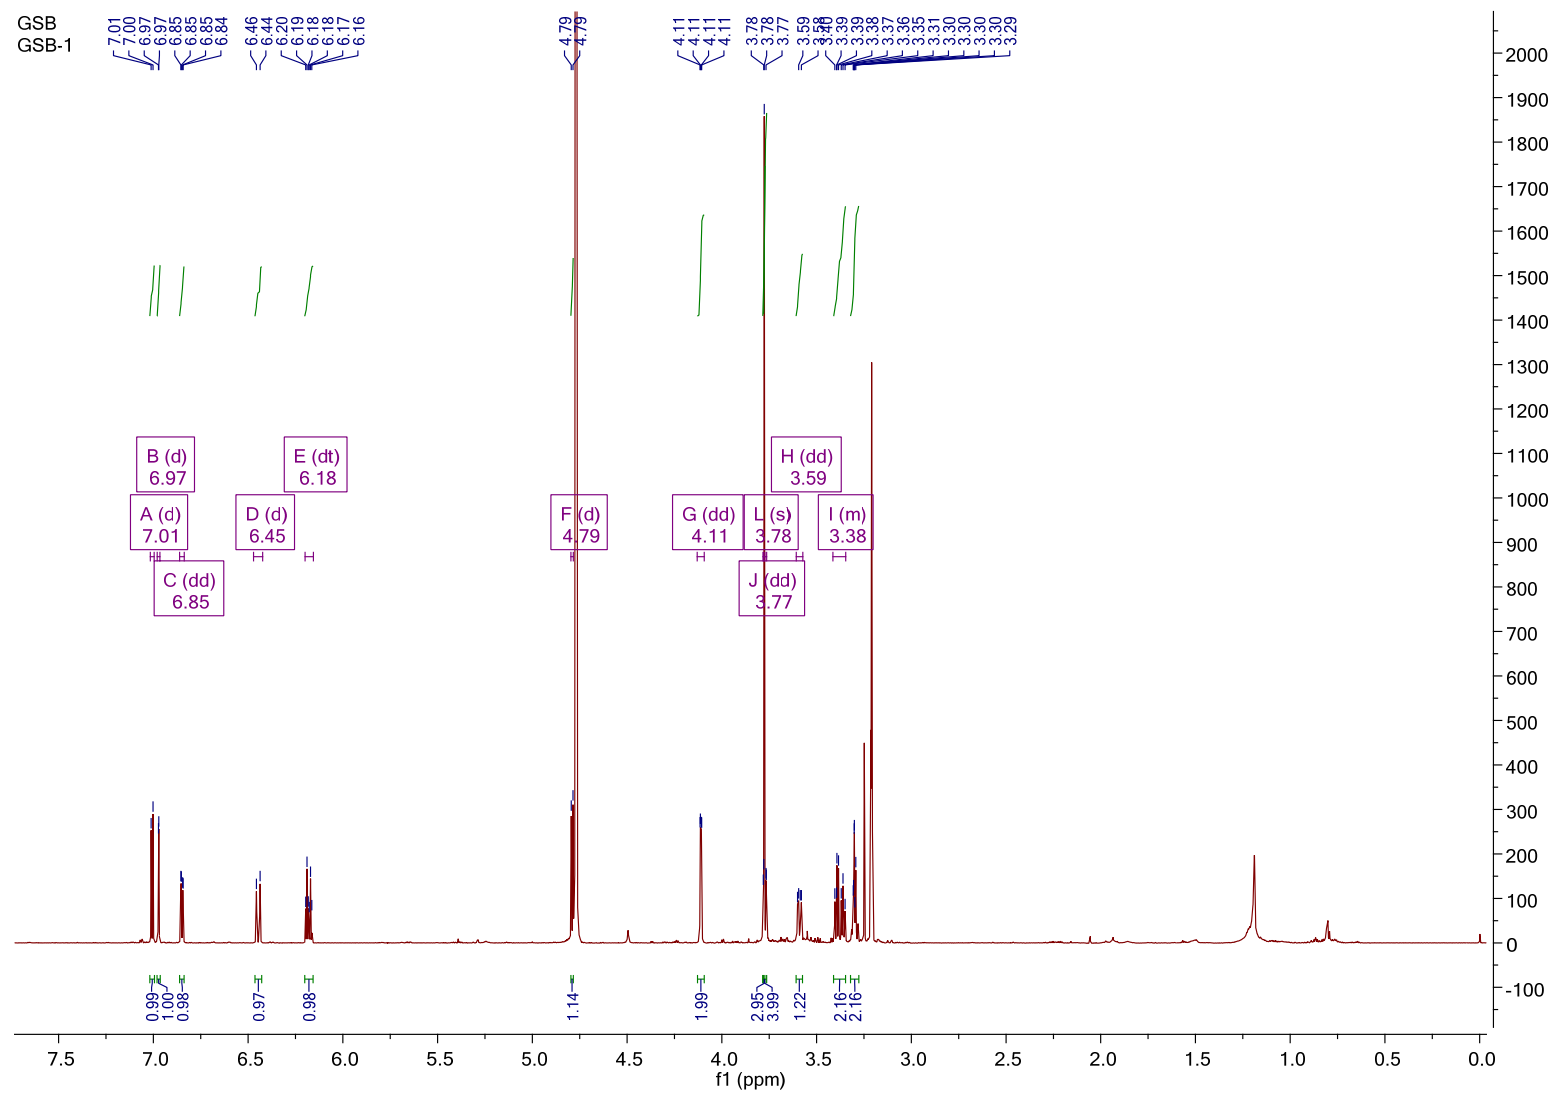

**Figure S10.** The ESIMS data of **3** (negative-ion mode)

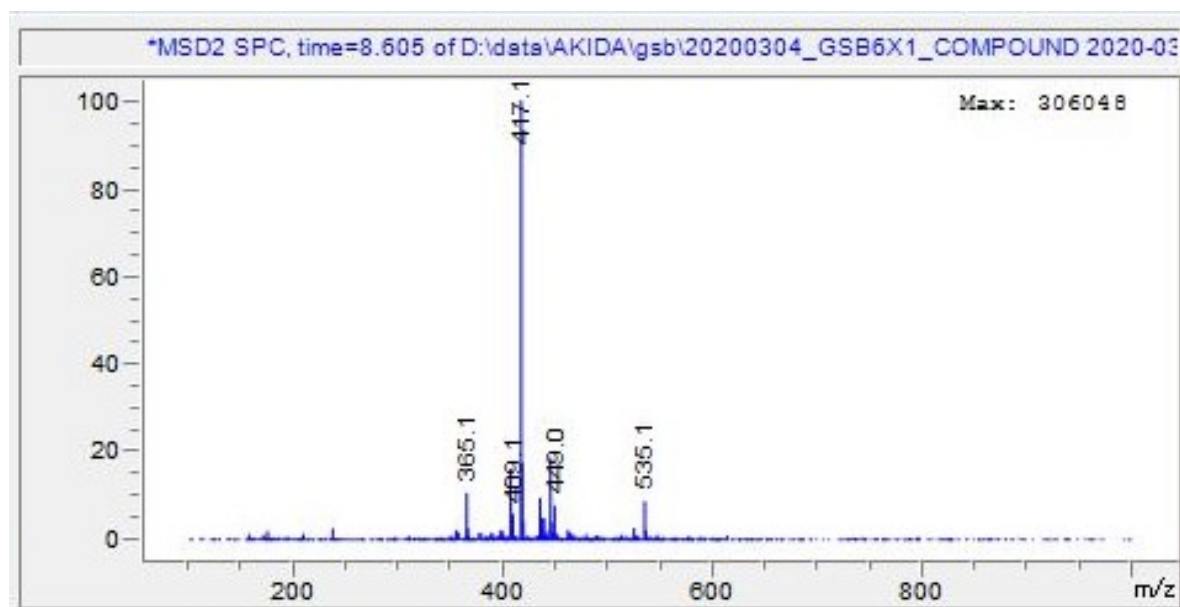

1H NMR spectrum of compound 10a in CDCl<sub>3</sub>. The spectrum shows peaks from 0 to 7 ppm. Key peaks are labeled: C (s) at 6.66 ppm, A (d) at 6.45 ppm, B (dt) at 6.23 ppm, F (s) at 4.78 ppm, D (dd) at 4.12 ppm, E (m) at 3.75 ppm, and G (m) at 3.51 ppm. Integration values are shown below the baseline: 1.95, 0.99, 1.00, 1.20, 2.10, and 6.01. A list of chemical shifts (delta) is provided at the top: 6.66, 6.46, 6.44, 6.25, 6.24, 6.23, 6.23, 6.22, 4.13, 4.12, 4.12, 3.76, 3.69, 3.57, 3.57, 3.56, 3.55, 3.53, 3.31, 3.31.

**Figure S12.** The ESIMS data of **4** (negative-ion mode)

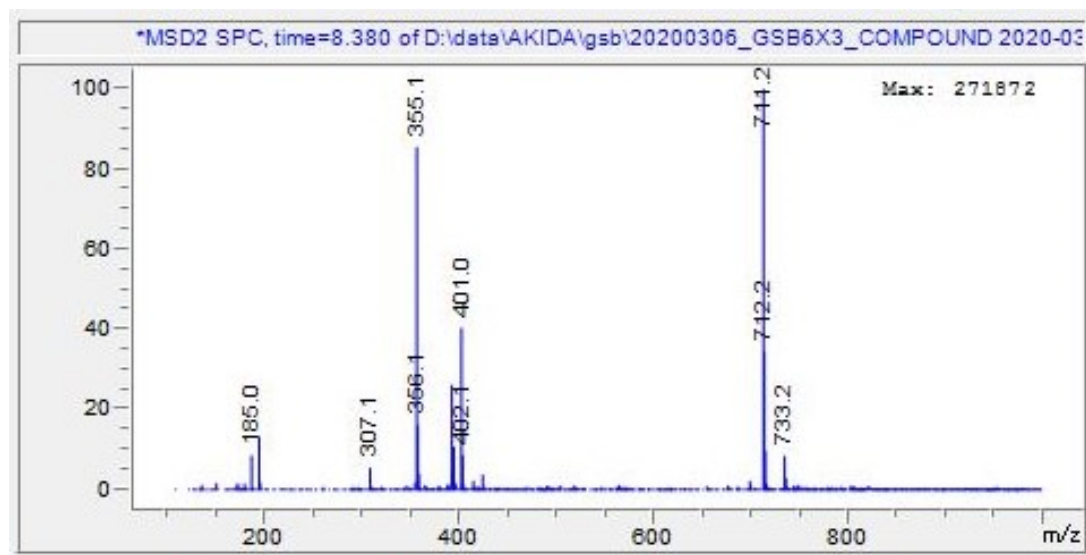

**Figure S13.** The  $^1\text{H}$  NMR spectrum of **4** ( $\text{CD}_3\text{OD}$ , 850 MHz)

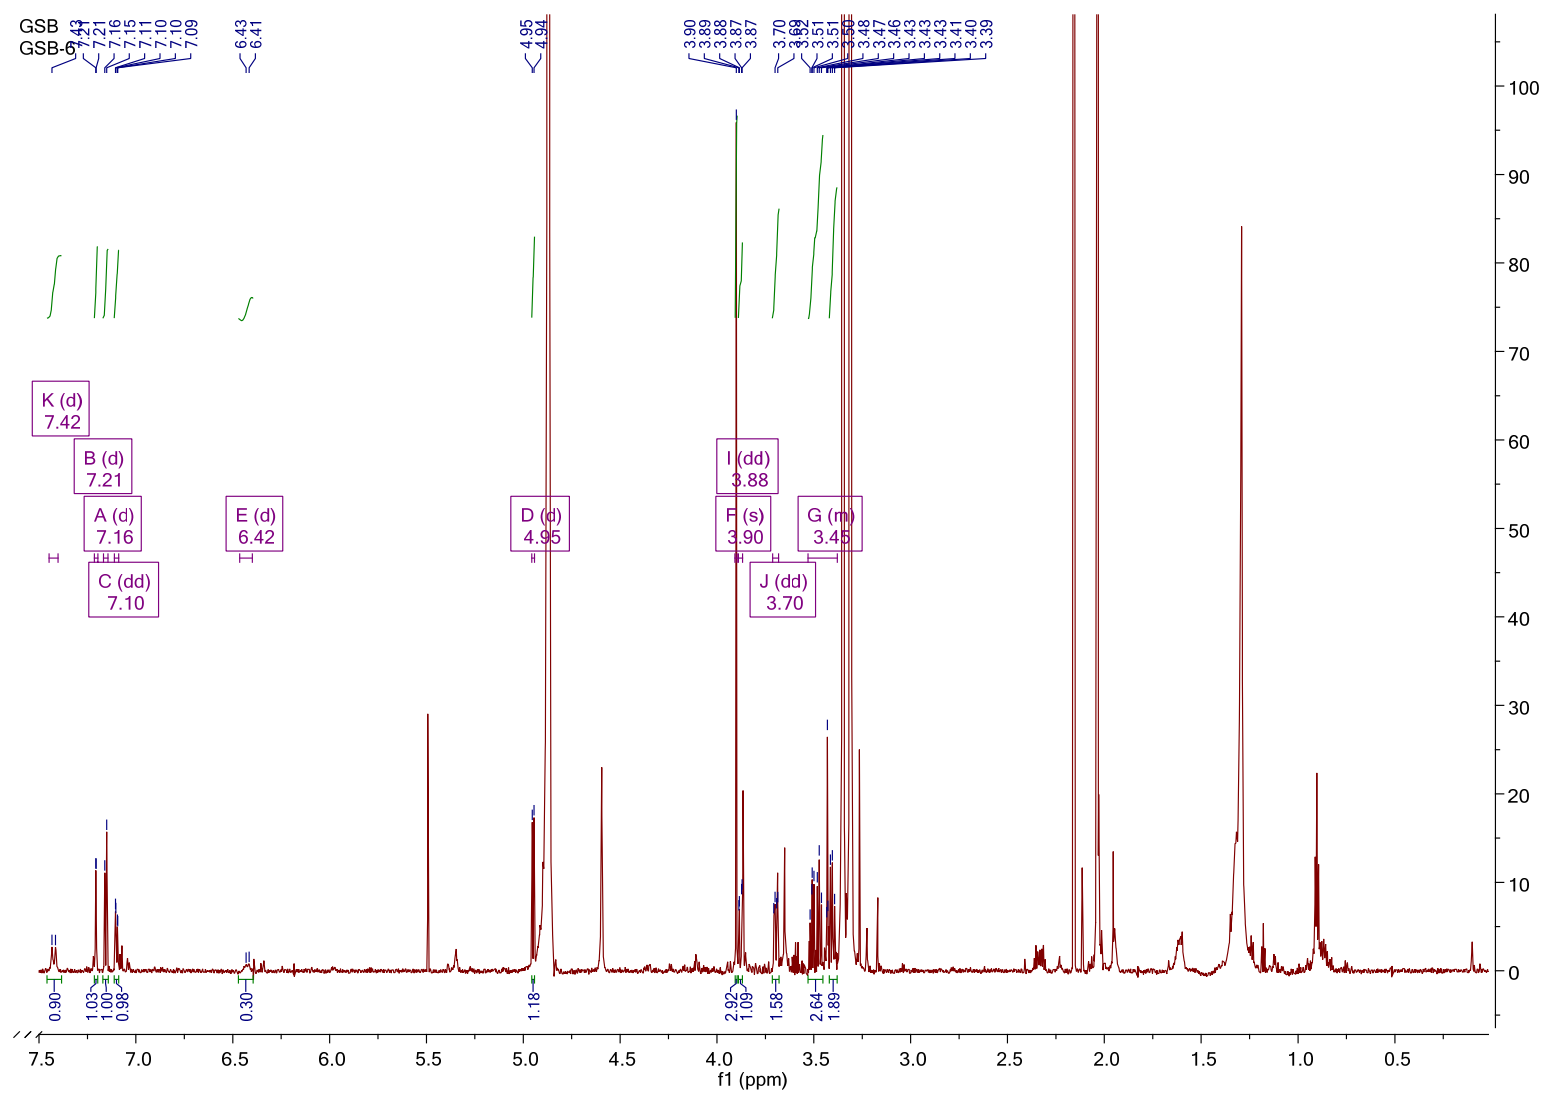

**Figure S14.** The ESIMS data of **5** (negative-ion mode)

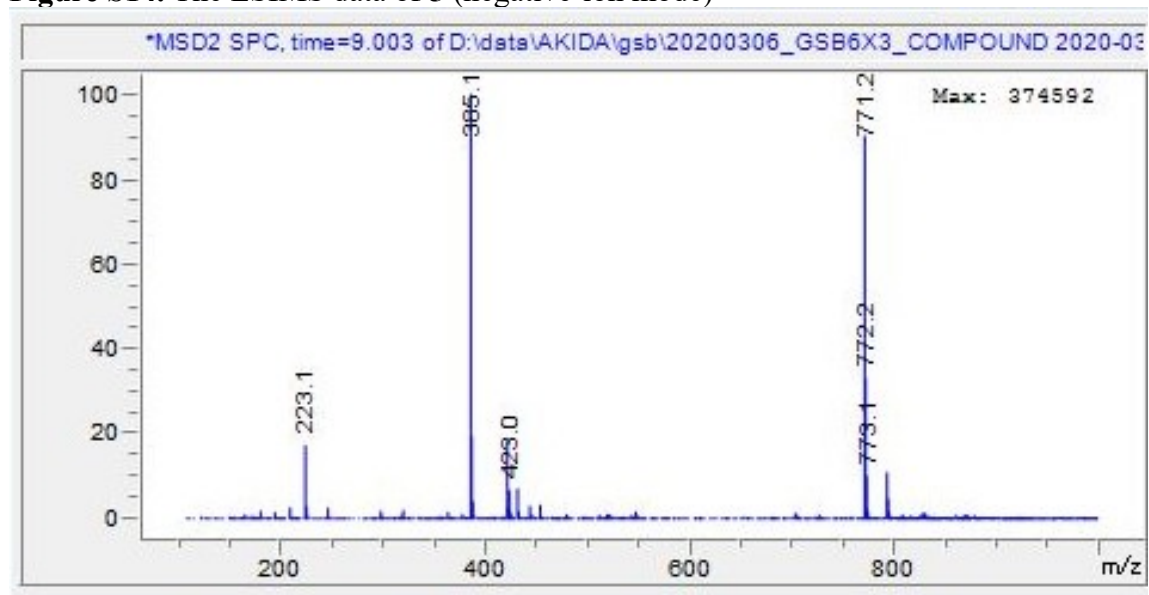

**Figure S15.** The  $^1\text{H}$  NMR spectrum of **5** ( $\text{CD}_3\text{OD}$ , 850 MHz)

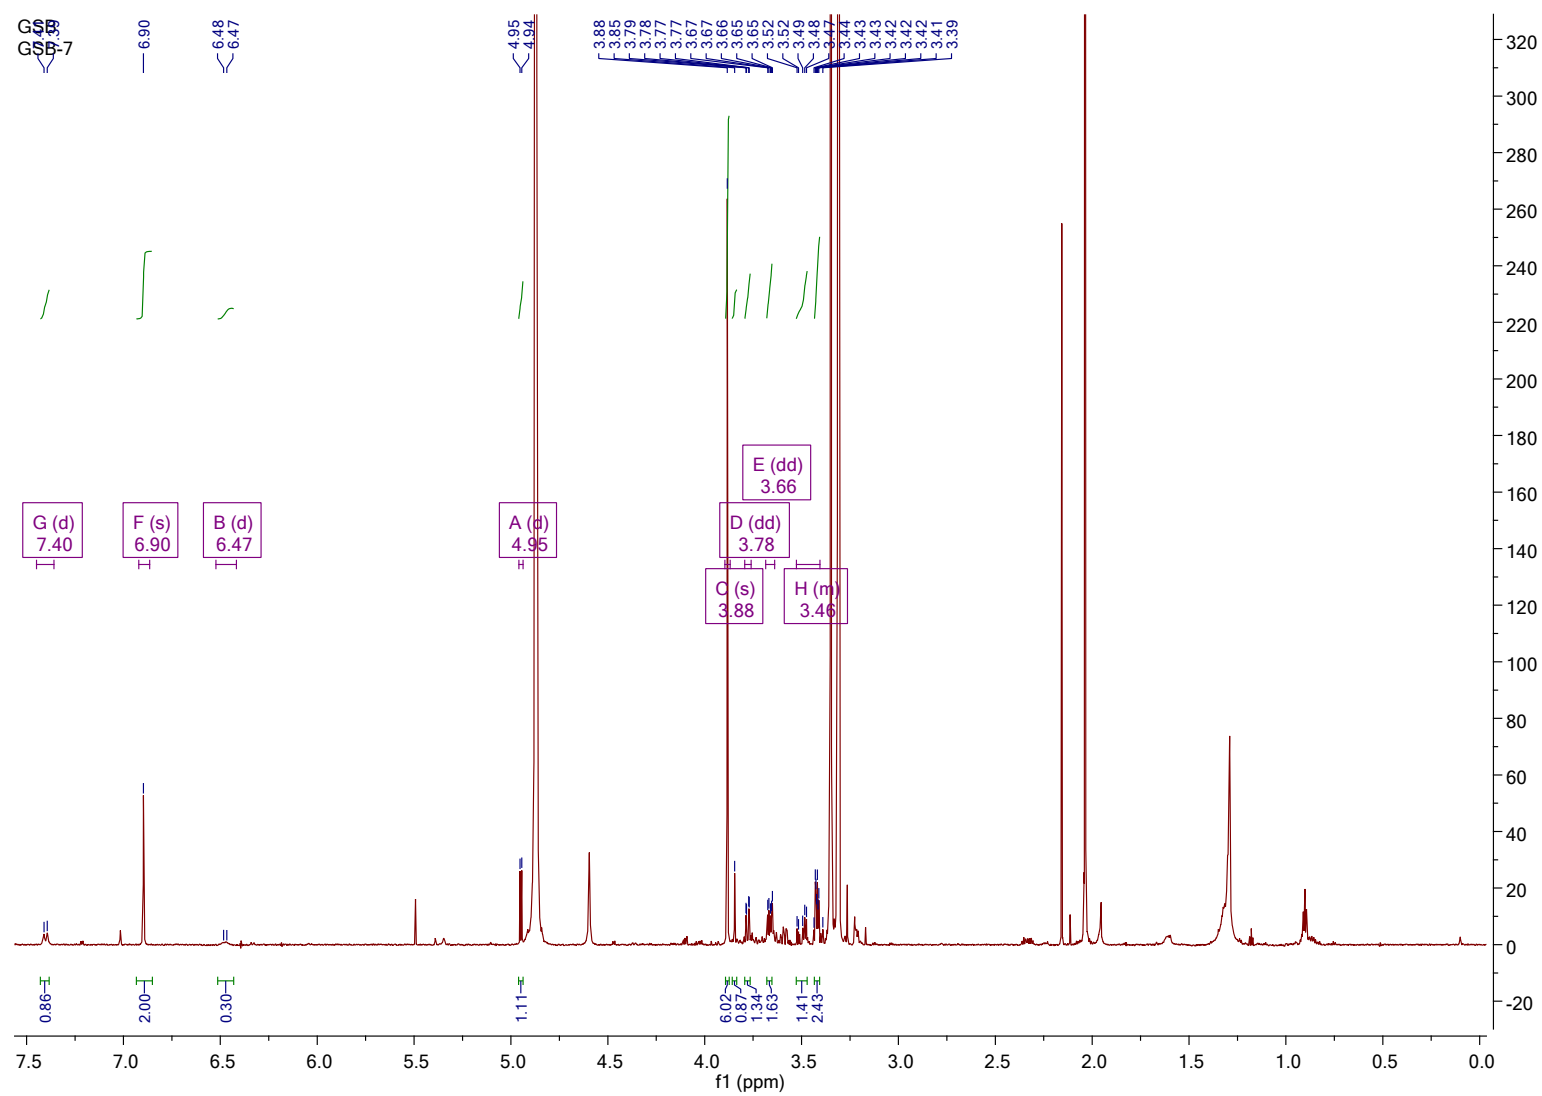

**Figure S16.** The ESIMS data of **6** (positive-ion mode)

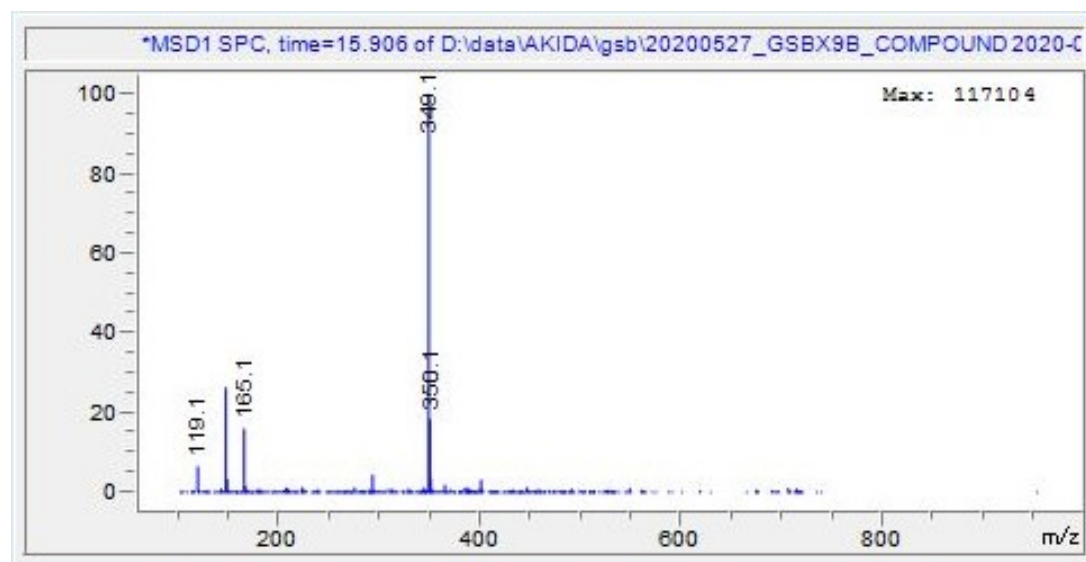

**Figure S17.** The  $^1\text{H}$  NMR spectrum of **6** ( $\text{CD}_3\text{OD}$ , 850 MHz)

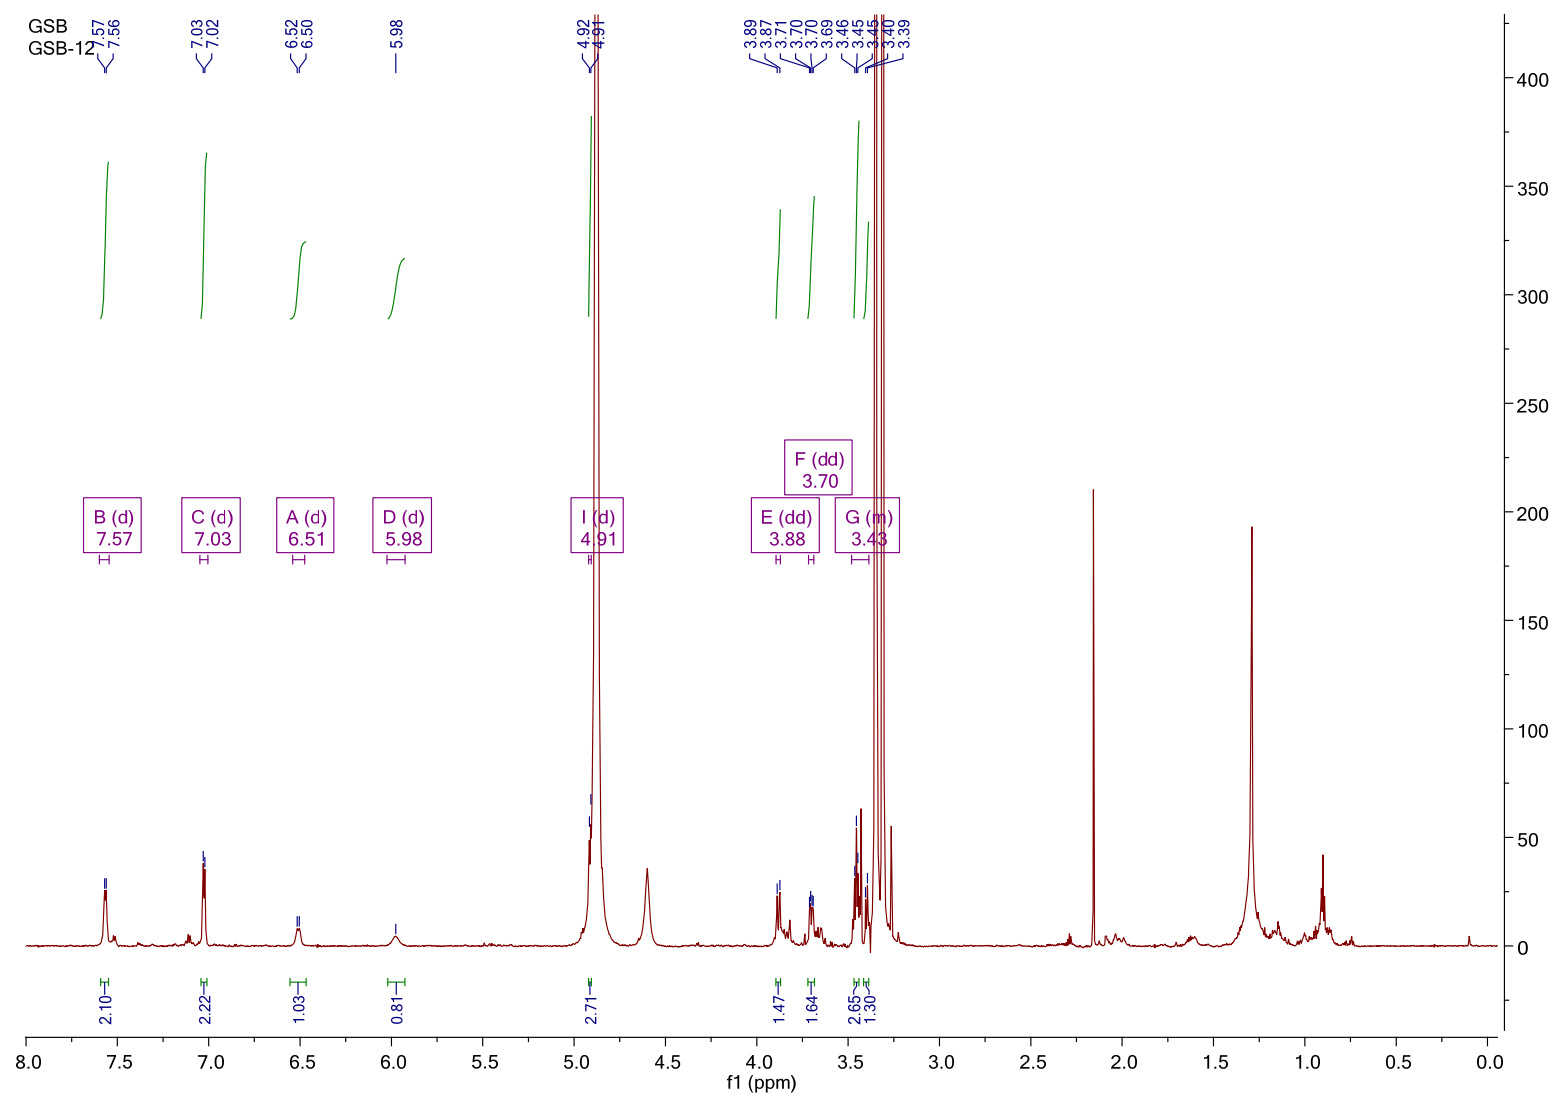

## General experimental procedure

Optical rotations were measured using a Jasco P-2000 polarimeter (Jasco, Easton, MD, USA). Infrared (IR) spectra were recorded with a Bruker IFS-66/S FT-IR spectrometer (Bruker, Karlsruhe, Germany). Ultraviolet (UV) spectra were acquired on an Agilent 8453 UV-visible spectrophotometer (Agilent Technologies, Santa Clara, CA, USA). Circular dichroism spectra were measured on a Jasco J-1500 spectropolarimeter (Jasco). NMR spectra were recorded using a Bruker AVANCE III HD 850 NMR spectrometer with a 5 mm TCI CryoProbe, operated at 850 MHz ( $^1\text{H}$ ) and 212.5 MHz ( $^{13}\text{C}$ ). The chemical shifts were represented in ppm ( $\delta$ ) for  $^1\text{H}$  and  $^{13}\text{C}$  NMR analyses. Preparative and semi-preparative HPLC was performed using a Waters 1525 Binary HPLC pump with a Waters 996 photodiode array detector (Waters Corporation, Milford, MA, USA) using an Agilent Eclipse C18 column (250  $\times$  21.2 mm, 5  $\mu\text{m}$ ; flow rate: 5 mL/min; Agilent Technologies) and a Phenomenex Luna Phenyl-hexyl 100 Å column (250  $\times$  10 mm, 5  $\mu\text{m}$ ; flow rate: 2 mL/min; Phenomenex, Torrance, CA, USA). LC/MS analysis was performed on an Agilent 1200 Series HPLC system, equipped with a diode array detector and 6130 Series ESI mass spectrometer, and an analytical Kinetex C18 100 Å column (100  $\times$  2.1 mm, 5  $\mu\text{m}$ ; flow rate: 0.3 mL/min; Phenomenex). All HRESIMS data were obtained using an Agilent G6545B quadrupole time-of-flight (Q-TOF) mass spectrometer (Agilent Technologies). Silica gel 60 (230-400 mesh; Merck, Darmstadt, Germany) was used for column chromatography. Diaion HP-20 (Mitsubishi Chemical, Tokyo, Japan) was used for open-column chromatography. Thin-layer chromatography was performed with precoated silica gel F<sub>254</sub> plates and RP-C<sub>18</sub> F<sub>254s</sub> plates (Merck) and spots were detected under UV light or by heating, after spraying with anisaldehyde-sulfuric acid.

## Plant material

The whole fruits of *G. biloba* were collected in the campus of Sungkyunkwan University, Suwon, Korea, in October 2019, and the plant was identified by one of the authors (K.H.K.). A voucher specimen of the material (GBF-2019-10) was deposited in the herbarium of the School of Pharmacy, Sungkyunkwan University, Suwon, Korea
